# Supplementary material for: Comparative Study of 52734-U-SupelMIP™ Solid-Phase and QuEChERS Extraction Methods for Monitoring 5-Nitroimidazoles in Albanian Honey
Source: Research Square preprint supplement (doi:10.21203/rs.3.rs-7283117/v1), 2025-08-21
Supplement: Supplementary file 1 [file 1c3c6b9356cd63685cdce94c.docx]

**Supporting Information**

**Comparative Study of 52734-U-SupelMIP™ Solid-Phase and QuEChERS Extraction Methods for Monitoring 5-Nitroimidazoles in Albanian Honey**

Kozeta Vaso*a, Ina Pashoa,b, Landi Dardhac, Esenina Strokad

aDepartment of Chemistry, University of Tirana, Tirana, Albania.

bNovartis Pharma Albania & Kosovo & North Macedonia, Tirana, Albania.

cDepartment of Chemical Sciences, Ariel University, Ari’el, Israel.

dDepartment of Mechanical and Industrial Engineering, University of Brescia, Brescia, Italy

*Corresponding author: Kozeta Vaso, [kozeta.vaso@fshn.edu.al](mailto:kozeta.vaso@fshn.edu.al)

Abbreviations:

**Å** – Angstrom (unit of length, used for pore size in chromatography)

**ACS** – American Chemical Society (for reagent grade)

**ANOVA** – Analysis of Variance

**C18** – Octadecylsilane (used in chromatography)

**CCD** – Colony Collapse Disorder

**CCα** – Decision Limit

**CCβ** – Detection Capability

**CE** – Collision Energy

**CIR** – Commission Implementing Regulation

**CITAC** – Cooperation on International Traceability in Analytical Chemistry

**DMSO** – Dimethyl Sulfoxide

**DMZ** – Dimetridazole

**EU** – European Union

**EU CIR 2021/808** – European Commission Implementing Regulation 2021/808

**EURACHEM** – European Network of Analytical Chemistry Laboratories

**EURL** – European Reference Laboratory

**FAPAS** – Food Analysis Performance Assessment Scheme

**HCL** – Highest Calibration Level

**Hg** – Mercury (used in vacuum/pressure units)

**HRMS** – High-Resolution Mass Spectrometry

**IPZ** – Ipronidazole

**kPa** – Kilopascal (pressure unit)

**LCL** – Lowest Calibration Level

**LC-MS/MS** – Liquid Chromatography-Tandem Mass Spectrometry

**LOD** – Limit of Detection

**LOQ** – Limit of Quantification

**ME** – Matrix Effect

**MIPs** – Molecularly Imprinted Polymers

**MMPR** – Minimum Method Performance Requirement

**MNZ** – Metronidazole

**MS** – Mass Spectrometry

**MS1/MS2** – Mass Spectrometry Stages 1 and 2

**MU** – Measurement Uncertainty

**NDZs** – Nitroimidazoles

**Orbitrap Exploris 480** – High-Resolution Mass Spectrometer

**pKa** – Acid Dissociation Constant

**PMCID** – PubMed Central Identifier

**PMID** – PubMed Identifier

**QuEChERS** – Quick, Easy, Cheap, Effective, Rugged, and Safe

**R²** – Coefficient of Determination (used in calibration curves)

**RNZ** – Ronidazole

**RS** – Resolution

**RSD** – Relative Standard Deviation

**RSD%** – Relative Standard Deviation Percentage

**SE** – Standard Error

**SPE** – Solid-Phase Extraction

**SupelMIP™ SPE** – SupelMIP™ Solid-Phase Extraction

**TIC** – Total Ion Chromatogram

**Tukey Test** – Tukey's Honest Significant Difference Test

**Table S1.**Eluent timing for the Agilent Technologies 6460 Triple Quadrupole LC/MS system

| Time (min) | 3.00 min | 7.00 min | 8.50 min | 11.00 min |
| --- | --- | --- | --- | --- |
| Eluent A (%) | 5.0 % | 5.0 % | 85.0 % | 85.0 % |
| Eluent B (%) | 95.0 % | 95.0 % | 15.0 % | 15.0 % |

**Table S2.** Accuracy, repeatability, within-lab reproducibility, and measurement uncertainty obtained for the studied extracted compounds in honey via 52734-U-SupelMIP columns.

| **Compound** | **Spike level (μg/kg)** | **Trueness (%)** | **Repeatability** | | | **Within-laboratory reproducibility** | | | **MU (%)** |
| --- | --- | --- | --- | --- | --- | --- | --- | --- | --- |
| **Mean (μg/kg)** | **SD** | **RSD (%)** | **Mean (μg/kg)** | **SD** | **RSD (%)** |
| **Metronidazole** | 0.30  0.50  1.00  1.50  2.00  3.00 | 99.66  97.68  102.70  98.70  100.08  99.89 | 0.29  0.47  1.00  1.48  1.99  2.98 | 0.01  0.03  0.00  0.03  0.02  0.03 | 2.10  5.35  0.01  1.72  0.78  0.98 | 0.29  0.45  0.99  1.47  1.99  2.95 | 0.01  0.05  0.02  0.04  0.01  0.05 | 3.88  10.64  0.58  2.47  0.66  1.71 | 10.55 |
| **Metronidazole-OH** | 0.30  0.50  1.00  1.50  2.00  3.00 | 102.48  98.77  98.99  98.39  80.81  89.99 | 0.30  0.47  0.97  1.49  1.98  2.97 | 0.01  0.03  0.03  0.01  0.03  0.06 | 1.99  6.14  2.50  0.63  1.48  1.95 | 0.28  0.50  0.97  1.46  1.92  2.96 | 0.03  0.00  0.06  0.05  0.14  0.05 | 9.95  0.12  5.63  3.62  7.40  1.76 | 13.01 |
| **Dimetridazole** | 0.30  0.50  1.00  1.50  2.00  3.00 | 78.99  85.69  75.41  79.99  83.44  69.98 | 0.29  0.48  0.96  1.47  1.95  2.95 | 0.01  0.03  0.03  0.02  0.05  0.05 | 3.45  5.63  3.06  1.05  2.31  1.69 | 0.25  0.46  0.91  1.44  1.95  2.80 | 0.05  0.07  0.10  0.05  0.08  0.10 | 17.24  14.74  10.15  3.51  4.15  3.39 | 15.95 |
| **HMMNI** | 0.30  0.50  1.00  1.50  2.00  3.00 | 99.09  78.67  95.99  87.88  89.56  88.88 | 0.29  0.44  0.99  1.46  1.94  2.94 | 0.02  0.02  0.01  0.05  0.01  0.07 | 7.96  3.31  0.68  3.42  0.30  2.45 | 0.29  0.44  0.99  1.44  1.94  2.94 | 0.06  0.00  0.06  0.03  0.12  0.11 | 19.90  0.25  5.51  2.20  6.22  3.75 | 15.05 |
| **Ipronidazole** | 0.30  0.50  1.00  1.50  2.00  3.00 | 95.79  79.98  89.59  79.99  88.99  97.89 | 0.28  0.47  0.93  1.46  1.94  2.94 | 0.02  0.03  0.06  0.03  0.06  0.07 | 5.27  5.35  5.63  2.21  2.92  2.20 | 0.30  0.47  0.93  1.47  1.96  2.95 | 0.01  0.01  0.060.03  0.04  0.07 | 1.99  2.23  6.08  2.09  2.07  2.48 | 14.45 |
| **Ronidazole** | 0.30  0.50  1.00  1.50  2.00  3.00 | 101.11  87.38  95.65  97.77  99.04  87.93 | 0.30  0.48  0.93  1.48  1.96  2.85 | 0.00  0.03  0.05  0.03  0.06  0.26 | 0.00  6.02  5.20  2.30  3.26  8.80 | 0.28  0.48  0.96  1.49  1.97  2.96 | 0.03  0.02  0.06  0.02  0.05  0.08 | 9.95  4.52  6.35  1.58  2.37  2.54 | 13.99 |
| **Tinidazole** | 0.30  0.50  1.00  1.50  2.00  3.00 | 97.65  79.79  90.90  97.88  95.45  76.65 | 0.27  0.48  0.93  1.48  2.00  2.70 | 0.03  0.03  0.06  0.03  0.00  0.25 | 9.12  6.14  5.77  2.37  0.00  8.38 | 0.30  0.47  1.00  1.50  1.94  2.81 | 0.01  0.01  0.00  0.00  0.03  0.23 | 1.79  2.23  0.00  0.14  1.36  7.84 | 12.12 |

**Table S3**. FAPAS proficiency test results for 5-nitroimidazole analysis in blank honey samples.

| Analyte | Assigned Value (μg/kg) | This work results (μg/kg) | Z-score | Performance |
| --- | --- | --- | --- | --- |
| Metronidazole | 1.21 | 1.11 | -0.80 | Satisfactory |
| Metronidazole-OH | 0.77 | 0.90 | +1.04 | Satisfactory |
| Dimetridazole | 1.10 | 1.07 | -0.24 | Satisfactory |
| HMMNI | 0.50 | 0.49 | -0.08 | Satisfactory |
| Ipronidazole | 1.00 | 1.09 | +0.72 | Satisfactory |
| Ronidazole | 0.33 | 0.33 | 0.00 | Satisfactory |
| Tinidazole | 0.35 | 0.30 | -0.4 | Satisfactory |

**Table S4**. FAPAS proficiency test results for 5-nitroimidazole analysis in blank honey samples.

| Analyte | Assigned Value (μg/kg) | This work results (μg/kg) | Z-score | Performance |
| --- | --- | --- | --- | --- |
| Metronidazole | 1.21 | 1.05 | -1.28 | Satisfactory |
| Metronidazole-OH | 0.77 | 0.75 | -0.16 | Satisfactory |
| Dimetridazole | 1.10 | 1.15 | +0.40 | Satisfactory |
| HMMNI | 0.50 | 0.45 | -0.40 | Satisfactory |
| Ipronidazole | 1.00 | 0.97 | -0.24 | Satisfactory |
| Ronidazole | 0.33 | 0.40 | +0.56 | Satisfactory |
| Tinidazole | 0.35 | 0.31 | -0.32 | Satisfactory |

**Table S5.** The ion fragmentation of metronidazole and the metabolite metronidazole-OH from precursor ion to product ions through MS.

| Scan Segments: |  | Precursor ion: | MS1/MS2 Residue: | Product ion: | CE (V): |
| --- | --- | --- | --- | --- | --- |
| Metronidazole |  | 172 | Unit/Enh (6490) | 128 and 82 | 7 and 9 |
| Metronidazole-OH | 3.47 | 1.88 | 144 and 123 | 7 and 9 |
| Metronidazole - |  | 175 | Unit/Enh (6490) | 131 | 9 |
| Metronidazole- | 3.47 | 190 | 125 | 9 |

**Table S6.**The data values for all the positive samples regarding MNZ and MNZ-OH (extraction method: 52734-U-SupelMIP columns vs. QuEChERS salts).

| Sample | M11 | M12 | M6 |
| --- | --- | --- | --- |
| City | Përmet | Përmet | Leskovik |
| Analyte | MNZ | MNZ | MNZ-OH |
| Extraction method | 52734-U-SupelMIP columns | | |
| C (μg/kg) | 53 | 0.59 | 35 |
| SE (μg/kg) | 11.3 | 0.25 | 5.6 |
| Extraction method | QuEChERS salts | | |
| C (μg/kg) | 43 | 0.98 | 30 |
| SE (μg/kg) | 15.33 | 1.99 | 10.02 |

* SE (μg/kg) means the standard error measured within the same sample after testing it three times with the same detection principle.

**Table S7.** Descriptive Statistics between MNZ, DMZ and MNZ-OH variables for two different extraction methods.

|  | **N** | **Missing** | **Mean** | **Standard Deviation** | **SE of mean** | **Lower 95% CI of Mean** | **Upper 95% CI of Mean** |
| --- | --- | --- | --- | --- | --- | --- | --- |
| MNZ | 7 | 0 | 0.90286 | 0.84263 | 0.31848 | 0.12356 | 1.68216 |
| MNZ-OH | 7 | 0 | 0.32071 | 0.28388 | 0.1073 | 0.05817 | 0.58326 |
| DMZ | 7 | 0 | 0.2 | 0.18824 | 0.07115 | 0.02591 | 0.37409 |
| MNZ | 7 | 0 | 0.90571 | 0.85011 | 0.32131 | 0.11949 | 1.69194 |
| MNZ-OH | 7 | 0 | 0.30071 | 0.27219 | 0.10288 | 0.04898 | 0.55245 |

| **Quantiles** | | | | | | | | | |
| --- | --- | --- | --- | --- | --- | --- | --- | --- | --- |
|  | **Mini-mum** | **1st Quartile (Q1)** | **Median** | **3rd Quartile (Q3)** | **Maxi-mum** | **Interquartile Range**  **(Q3 - Q1)** | **Range (Maximum - Minimum)** | **Median Absolute Deviation** | **Robust Coefficient of Variation** |
| MNZ | 0 | 0.18 | 0.74 | 1.54 | 2.36 | 1.36 | 2.36 | 0.56 | 1.12197 |
| MNZ-OH | 0 | 0.075 | 0.27 | 0.55 | 0.8 | 0.475 | 0.8 | 0.195 | 1.07077 |
| DMZ | 0 | 0.05 | 0.15 | 0.33 | 0.53 | 0.28 | 0.53 | 0.12 | 1.18608 |
| MNZ | 0 | 0.23 | 0.67 | 1.54 | 2.4 | 1.31 | 2.4 | 0.48 | 1.06216 |
| MNZ-OH | 0 | 0.075 | 0.2 | 0.55 | 0.75 | 0.475 | 0.75 | 0.18 | 1.33434 |

| **Parameter Estimates** | | | | | | |
| --- | --- | --- | --- | --- | --- | --- |
|  | **Distribution** | **Parameter** | **Estimate** | **Lower 95%** | **Upper 95%** | **SD of Estimate** |
| MNZ | Normal | Location mu | 0.90286 | 0.27864 | 1.52707 | 0.31848 |
|  | Scale sigma | 0.84263 | 0.46665 | 1.52154 | 0.25406 |
| MNZ-OH | Normal | Location mu | 0.32071 | 0.11042 | 0.53101 | 0.1073 |
|  | Scale sigma | 0.28388 | 0.15721 | 0.5126 | 0.08559 |
| DMZ | Normal | Location mu | 0.2 | 0.06055 | 0.33945 | 0.07115 |
|  | Scale sigma | 0.18824 | 0.10425 | 0.3399 | 0.05676 |
| MNZ | Normal | Location mu | 0.90571 | 0.27595 | 1.53548 | 0.32131 |
|  | Scale sigma | 0.85011 | 0.47079 | 1.53506 | 0.25632 |
| MNZ-OH | Normal | Location mu | 0.30071 | 0.09908 | 0.50235 | 0.10288 |
|  | Scale sigma | 0.27219 | 0.15074 | 0.49149 | 0.08207 |

(a)
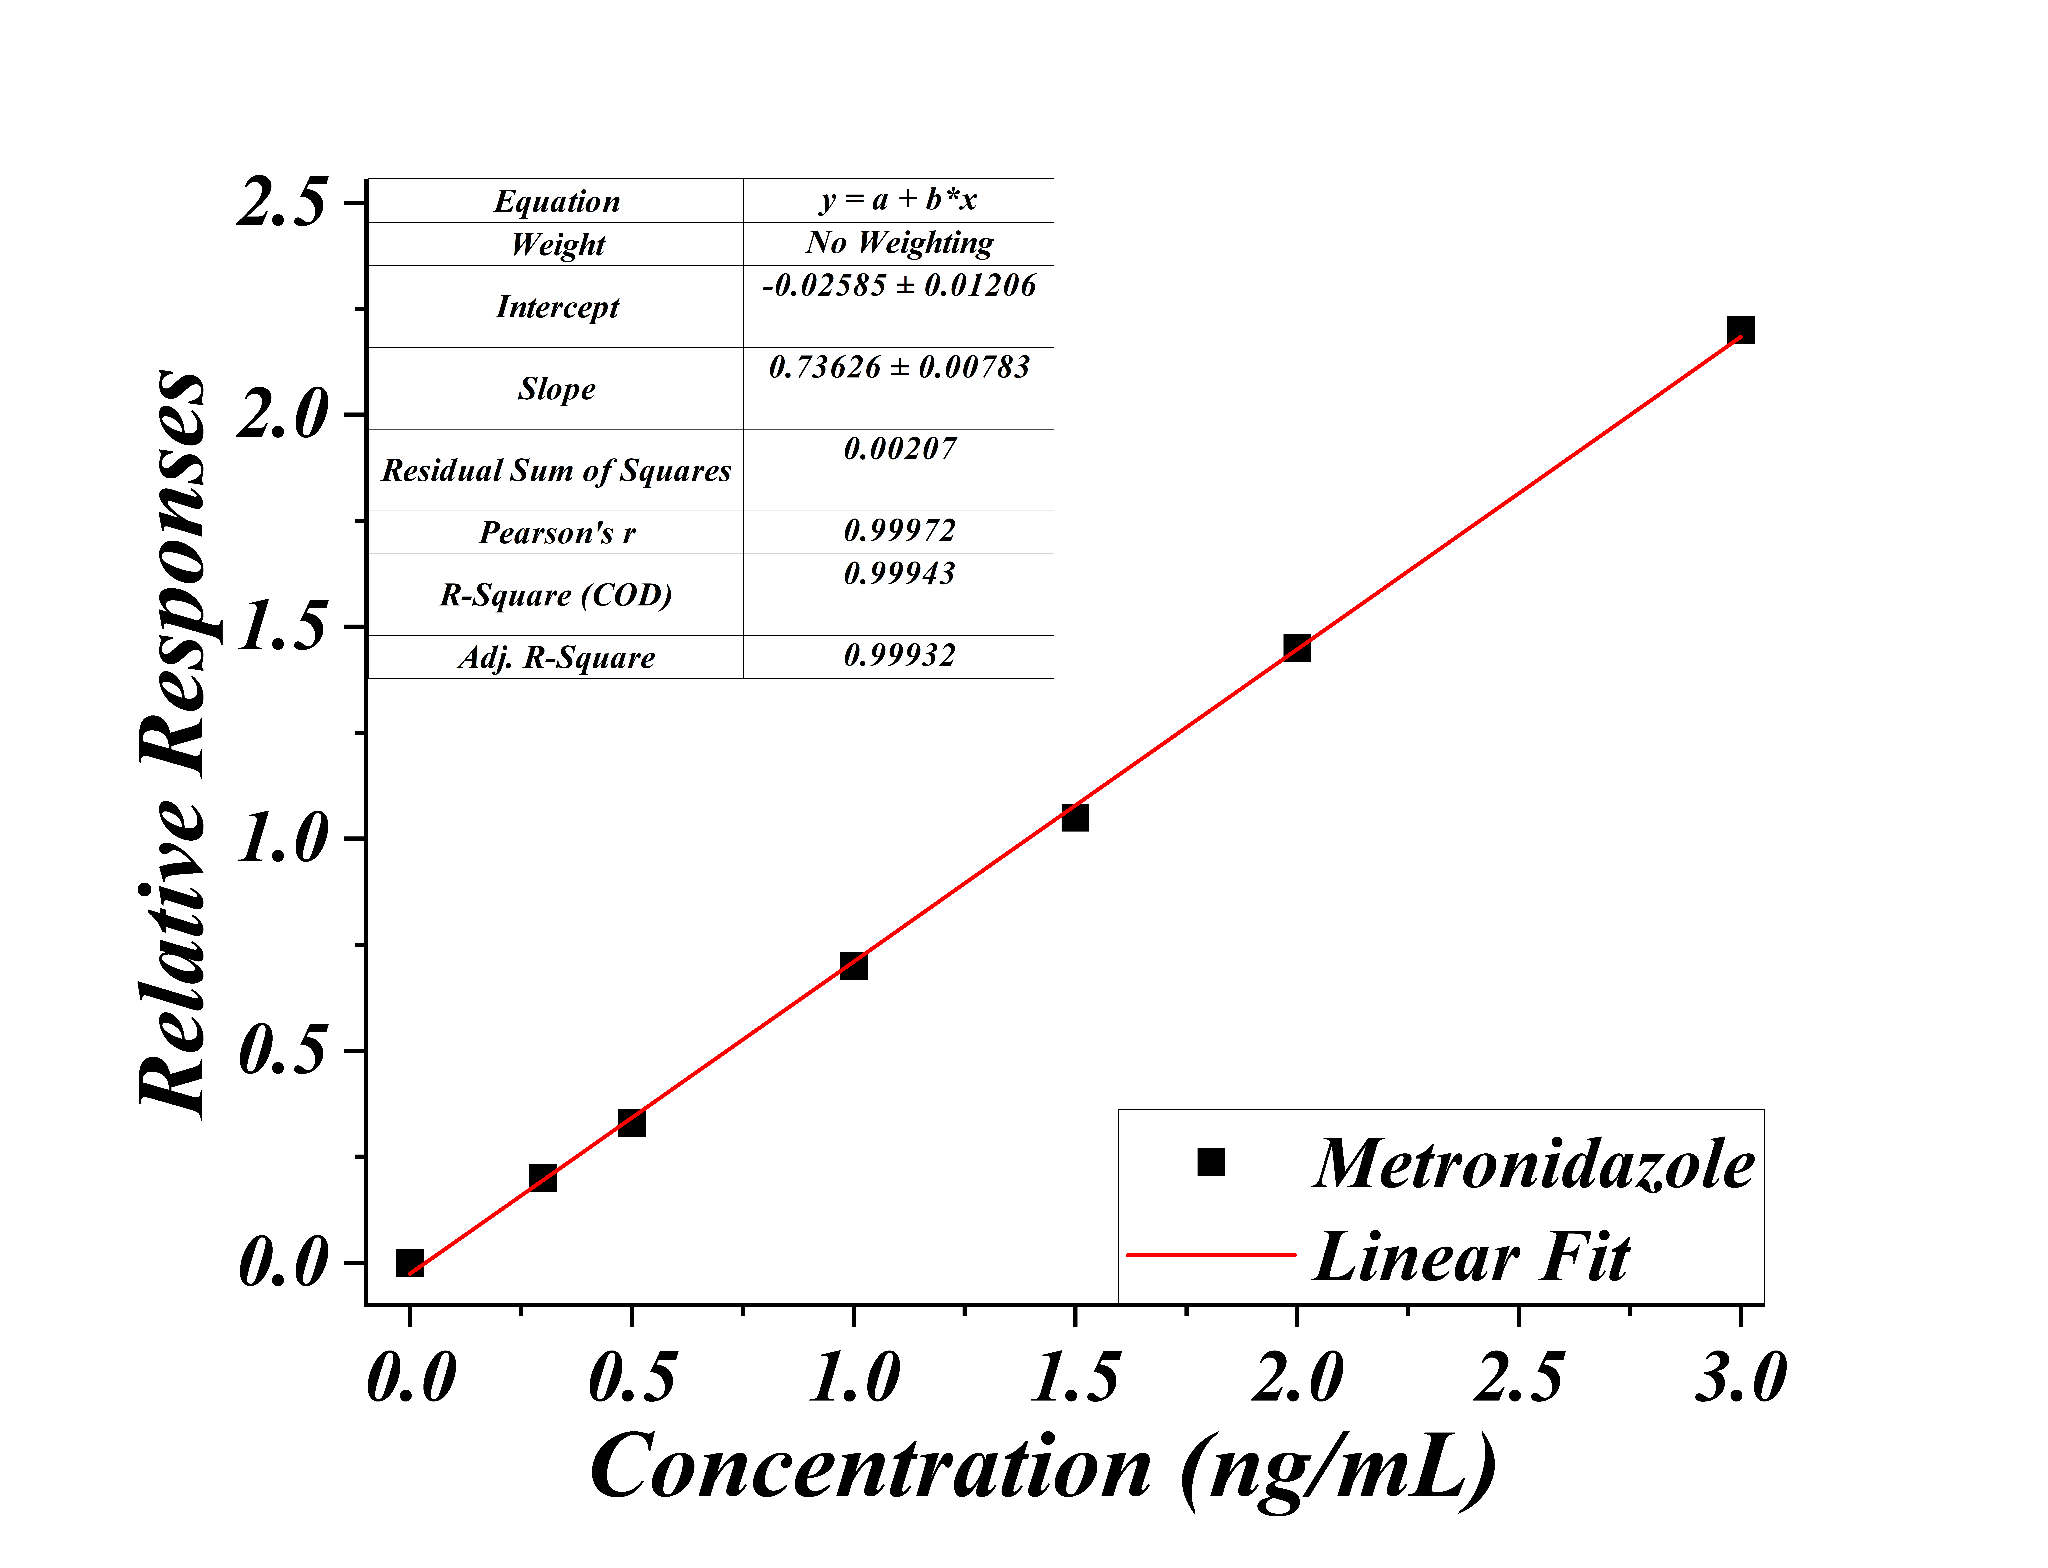
(b)
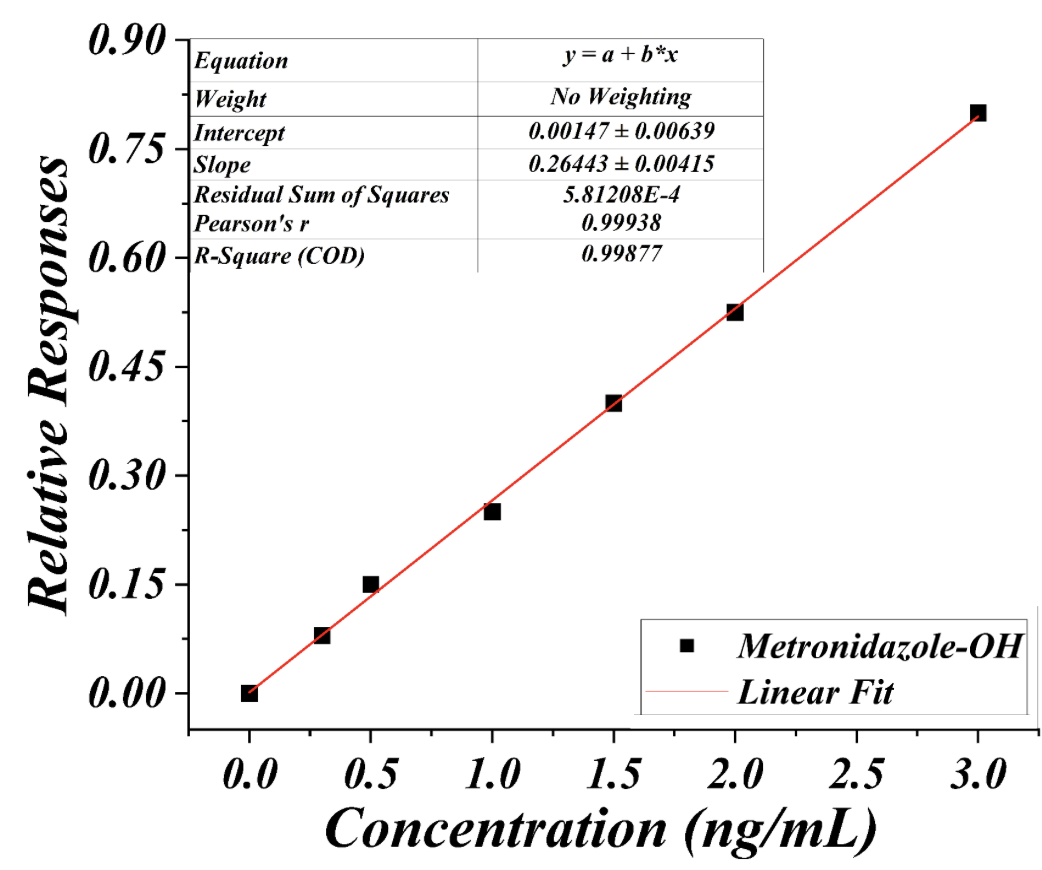


(c)
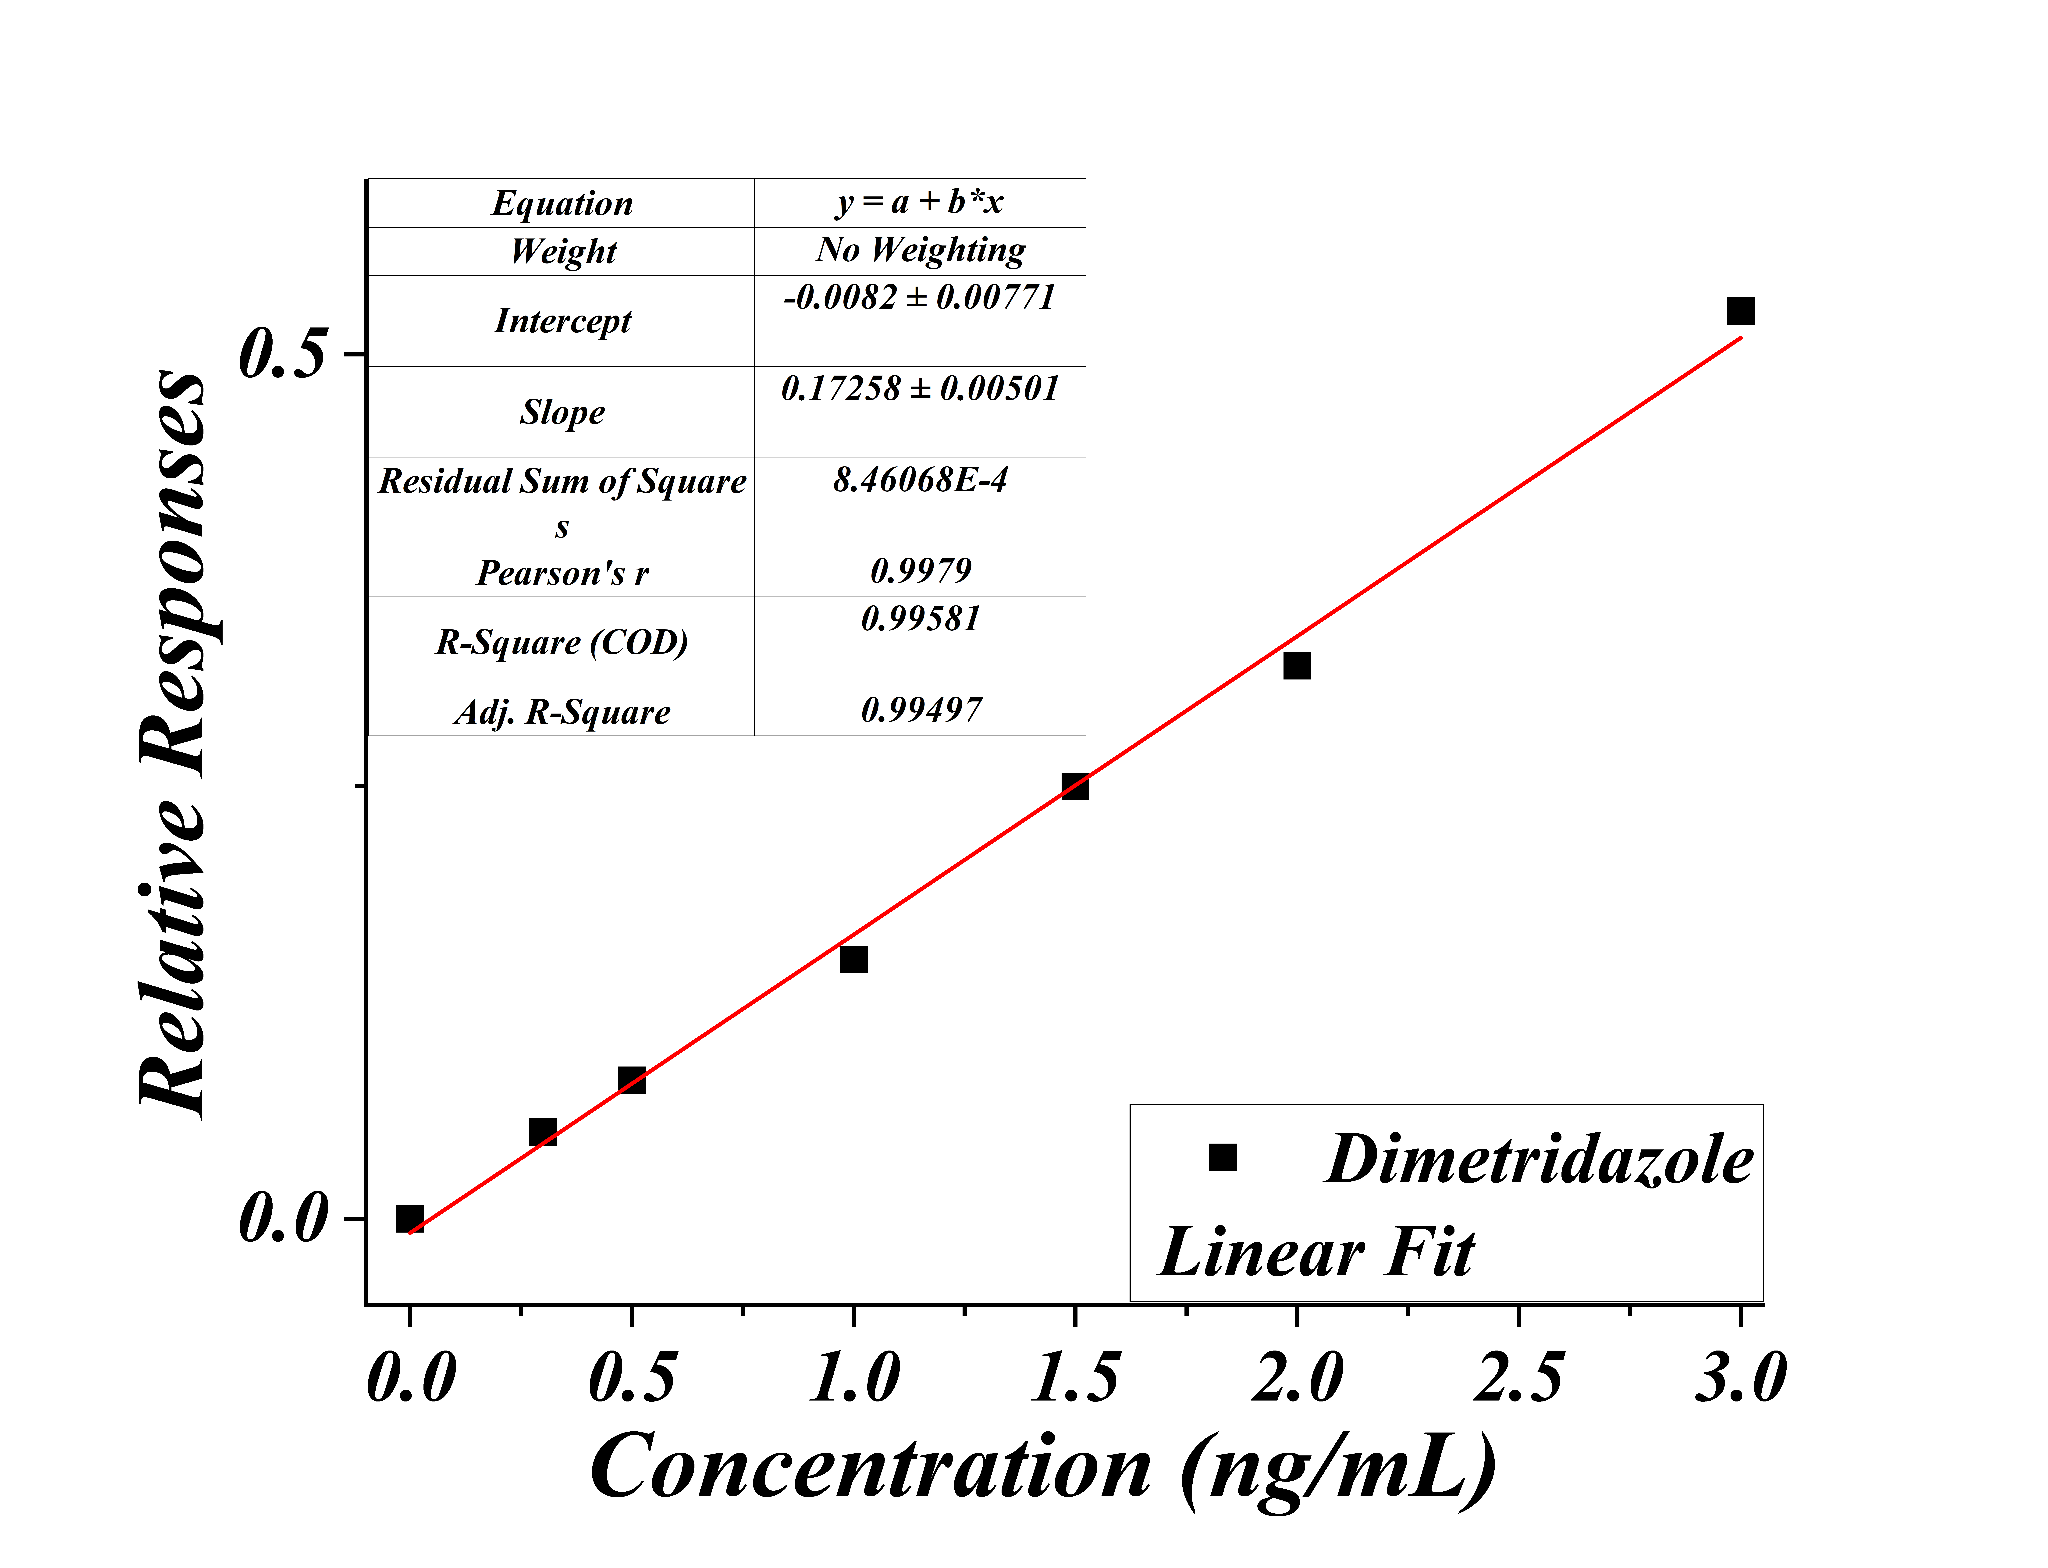
 (d)
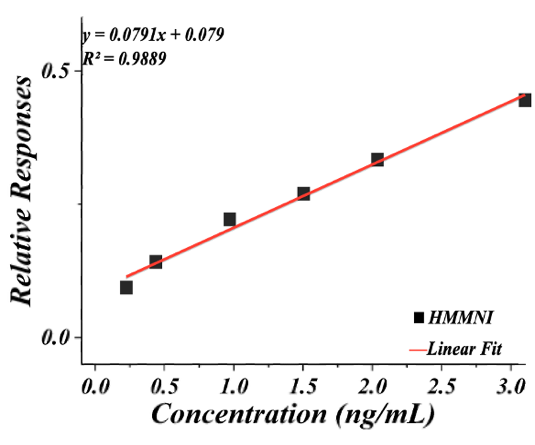


(e)
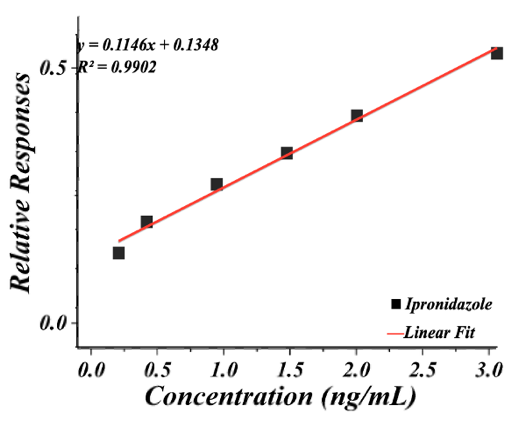
 (f)
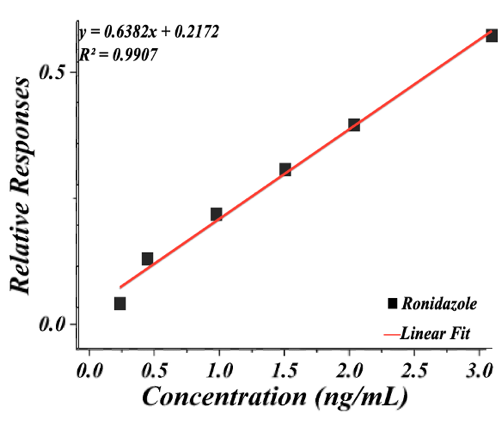


(g)
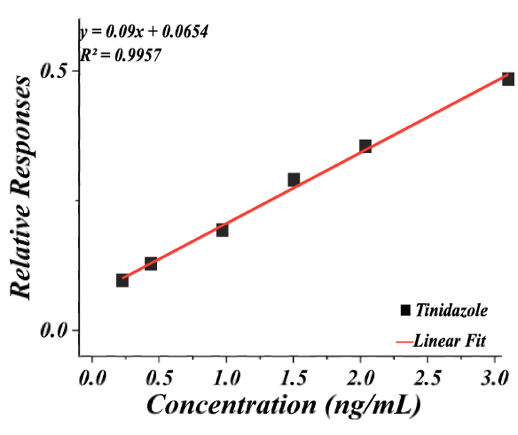


**Figure S1.** The calibration curves for analytes (nitroimidazole extraction via 52734-U-SupelMIP columns): (a) metronidazole (MNZ), (b) Metronidazole-OH (MNZ-OH), (c) Dimetridazole (DMZ), (d) Hydroxy dimetridazole (HMMNI), (e) Ipronidazole, (f) Ronidazole, and (g) Tinidazole.


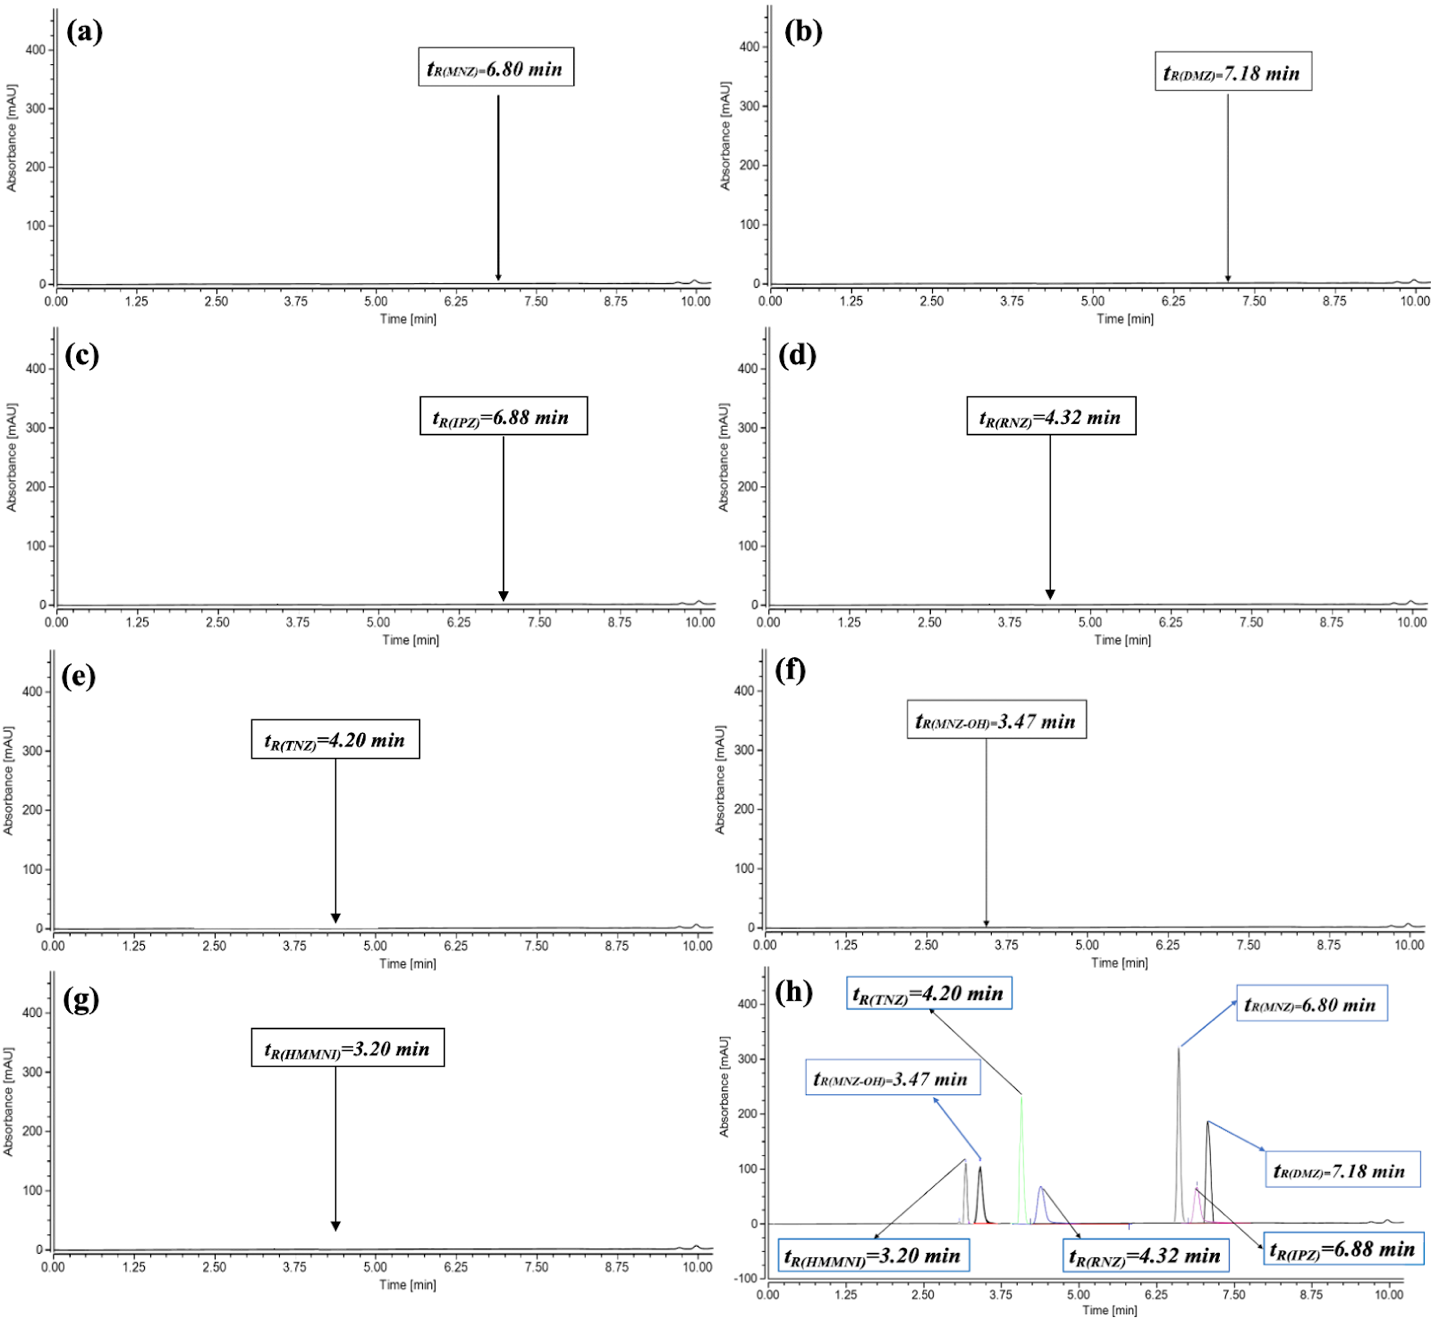


**Figure S2. (a, b, c, d, e, f, and g)** Extracted ion chromatograms for the investigated compounds, showing the absence of peaks in blank honey samples extracts (from both extraction methods) and **(h)** TIC chromatogram peaks of internal standards 5-nitroimidazoles at a concentration level of 1 μg/kg. (Analyzed using ChromeleonSoft).

(a)
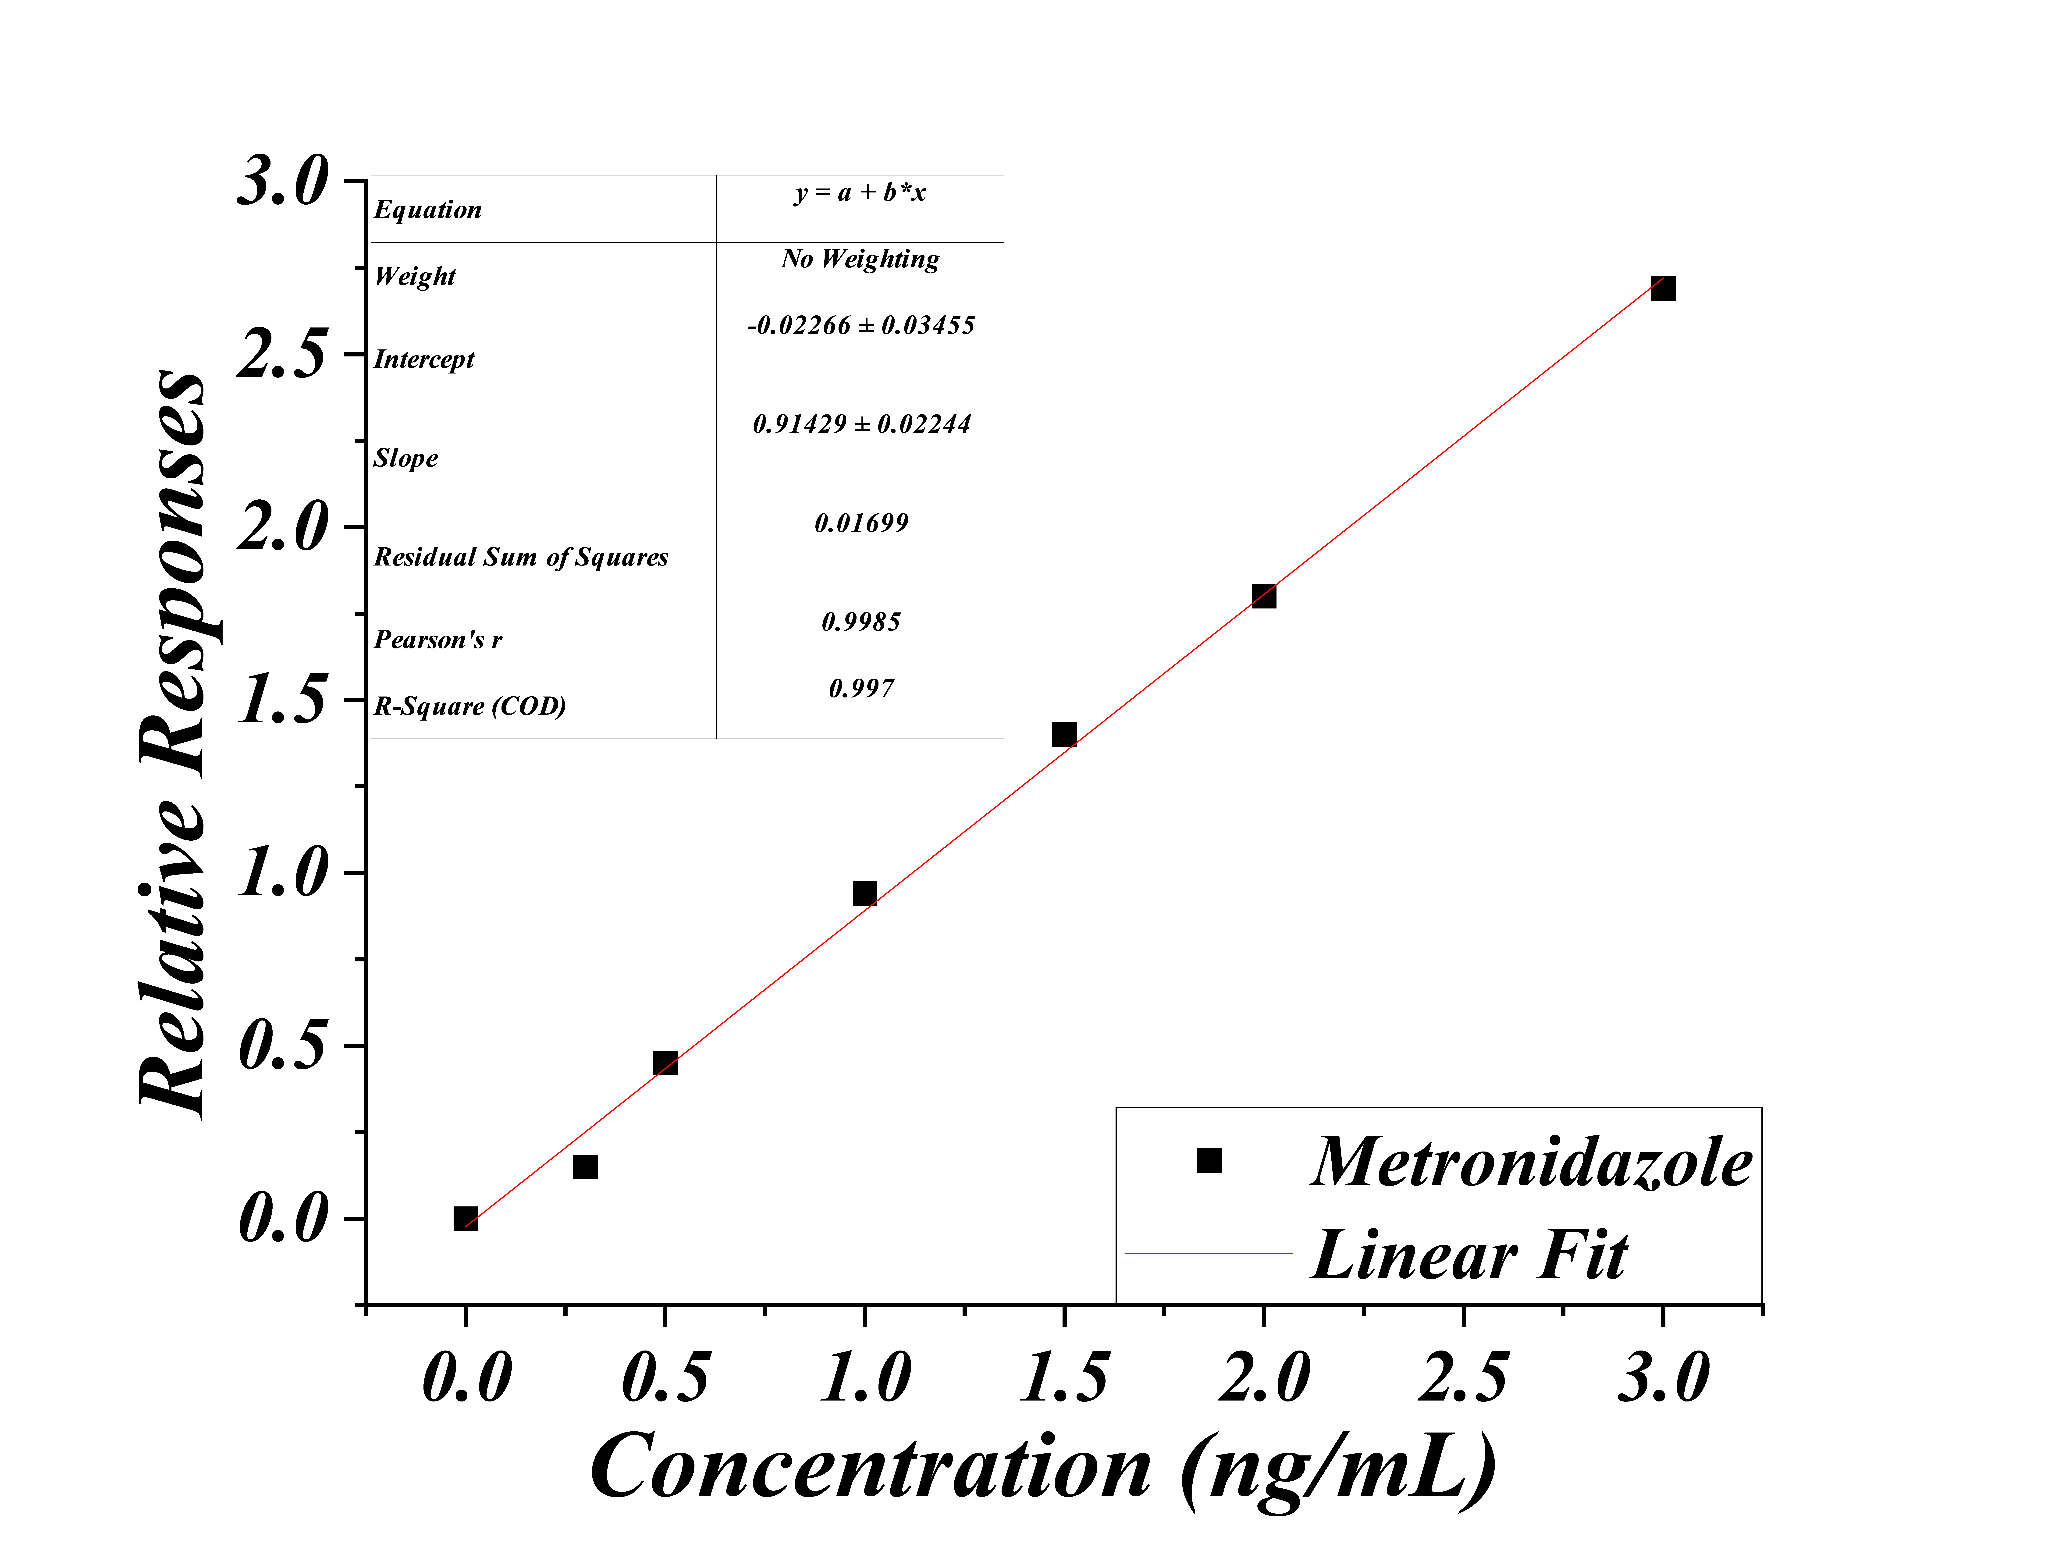
(b)
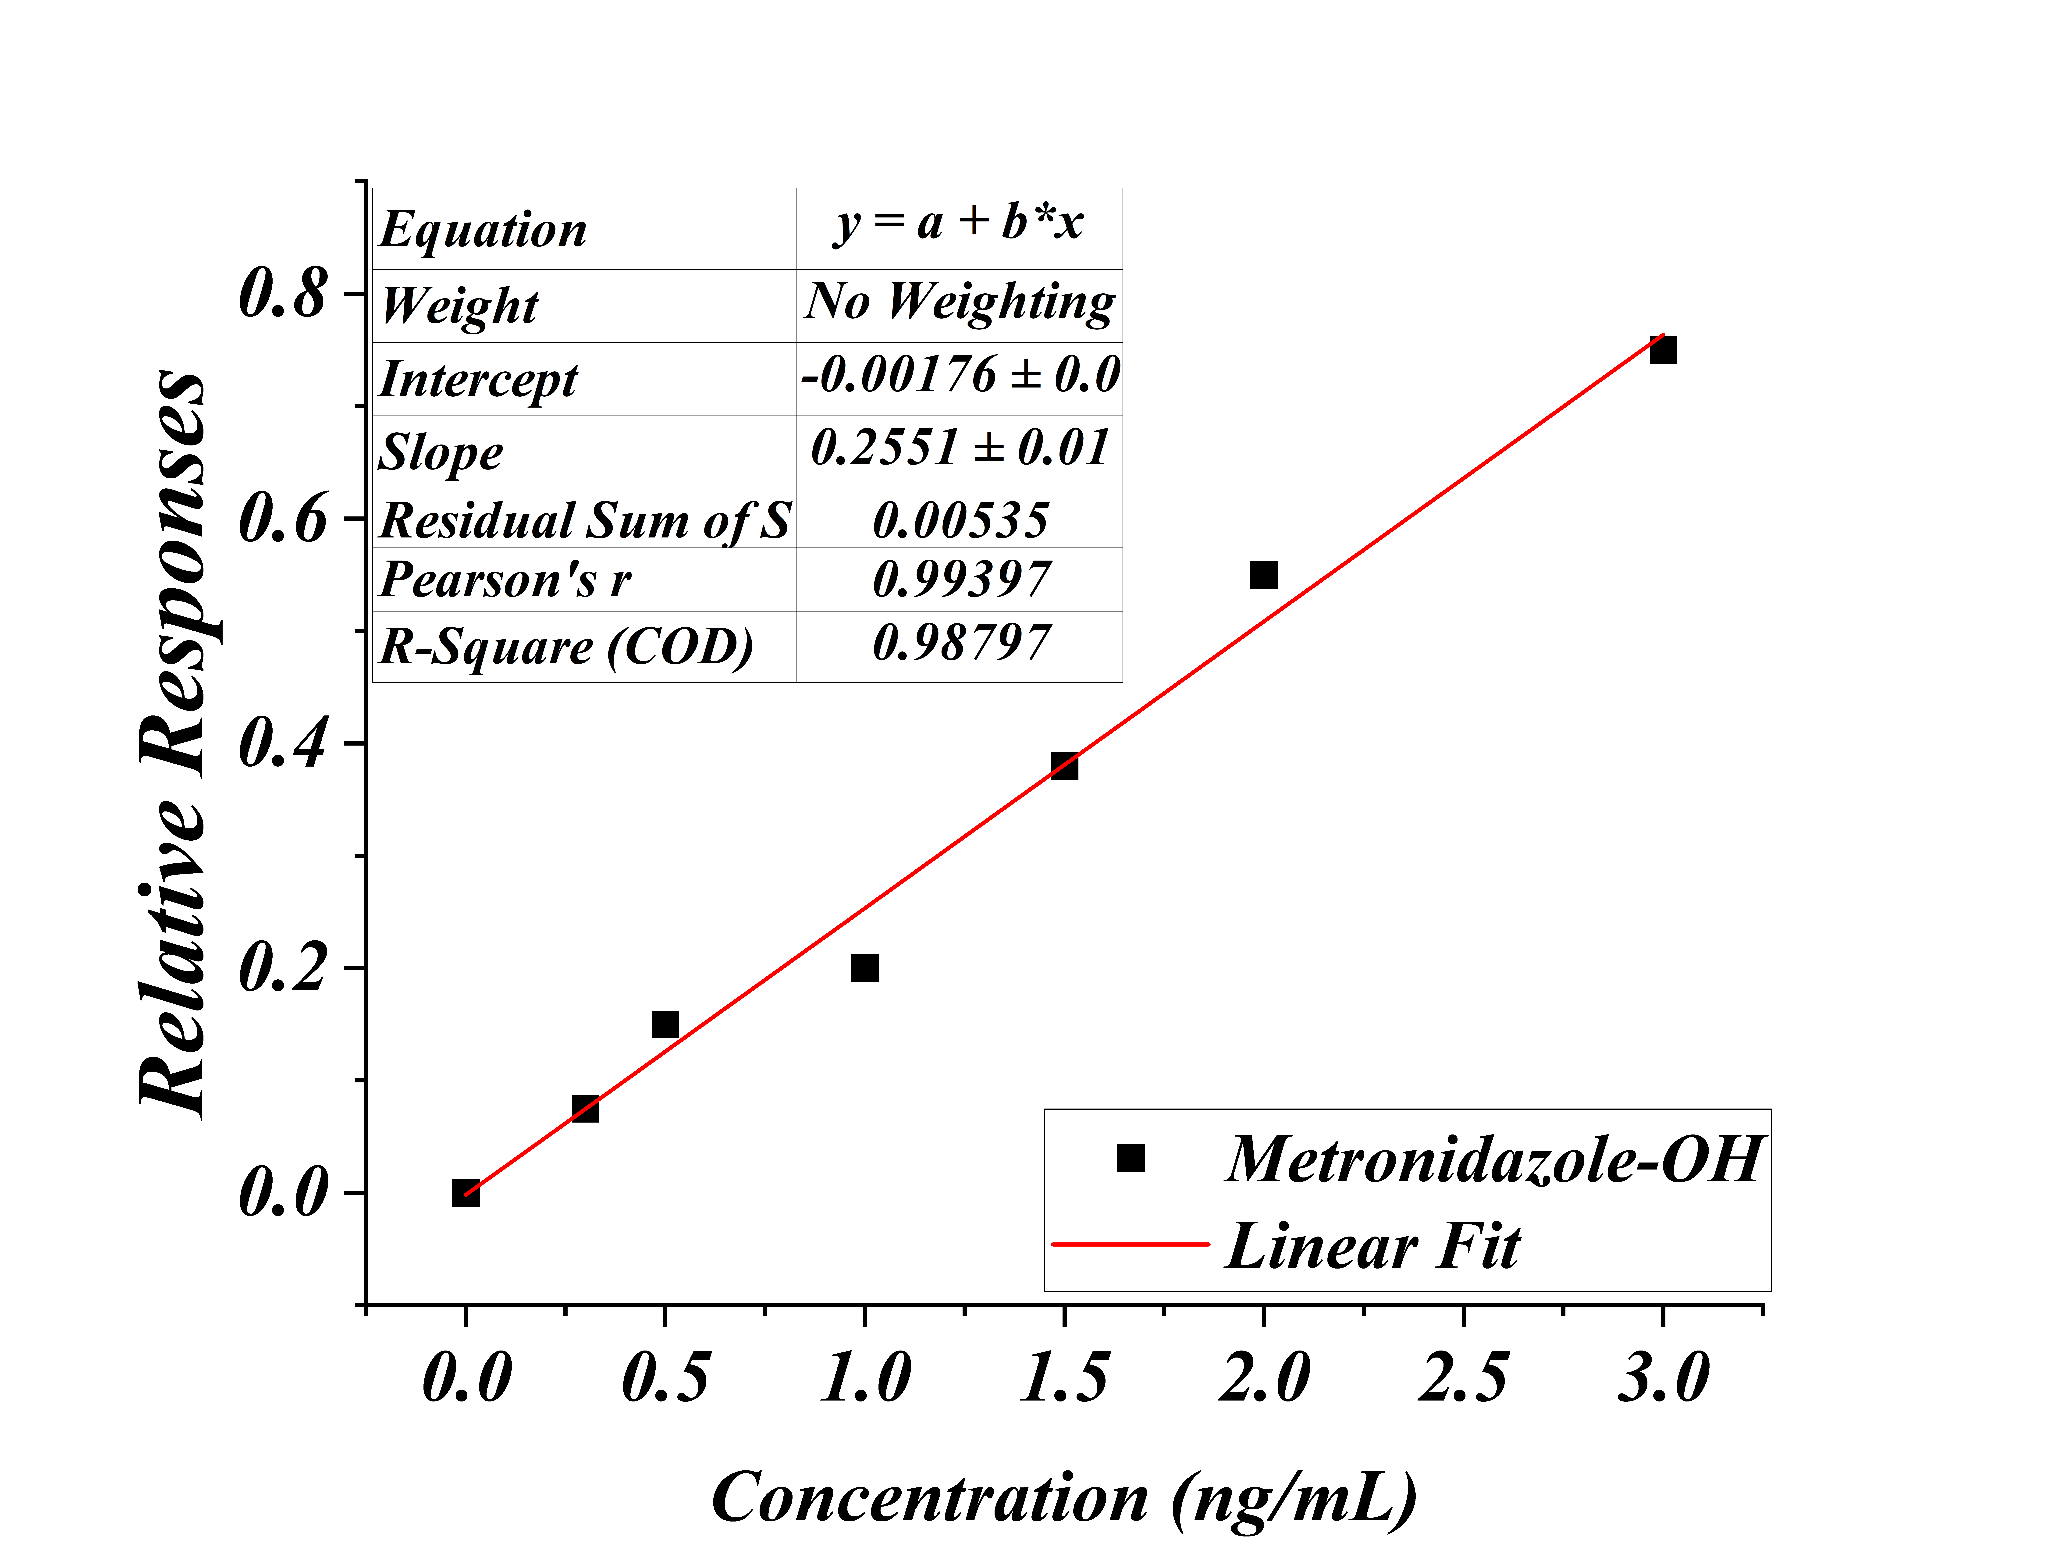


(c)
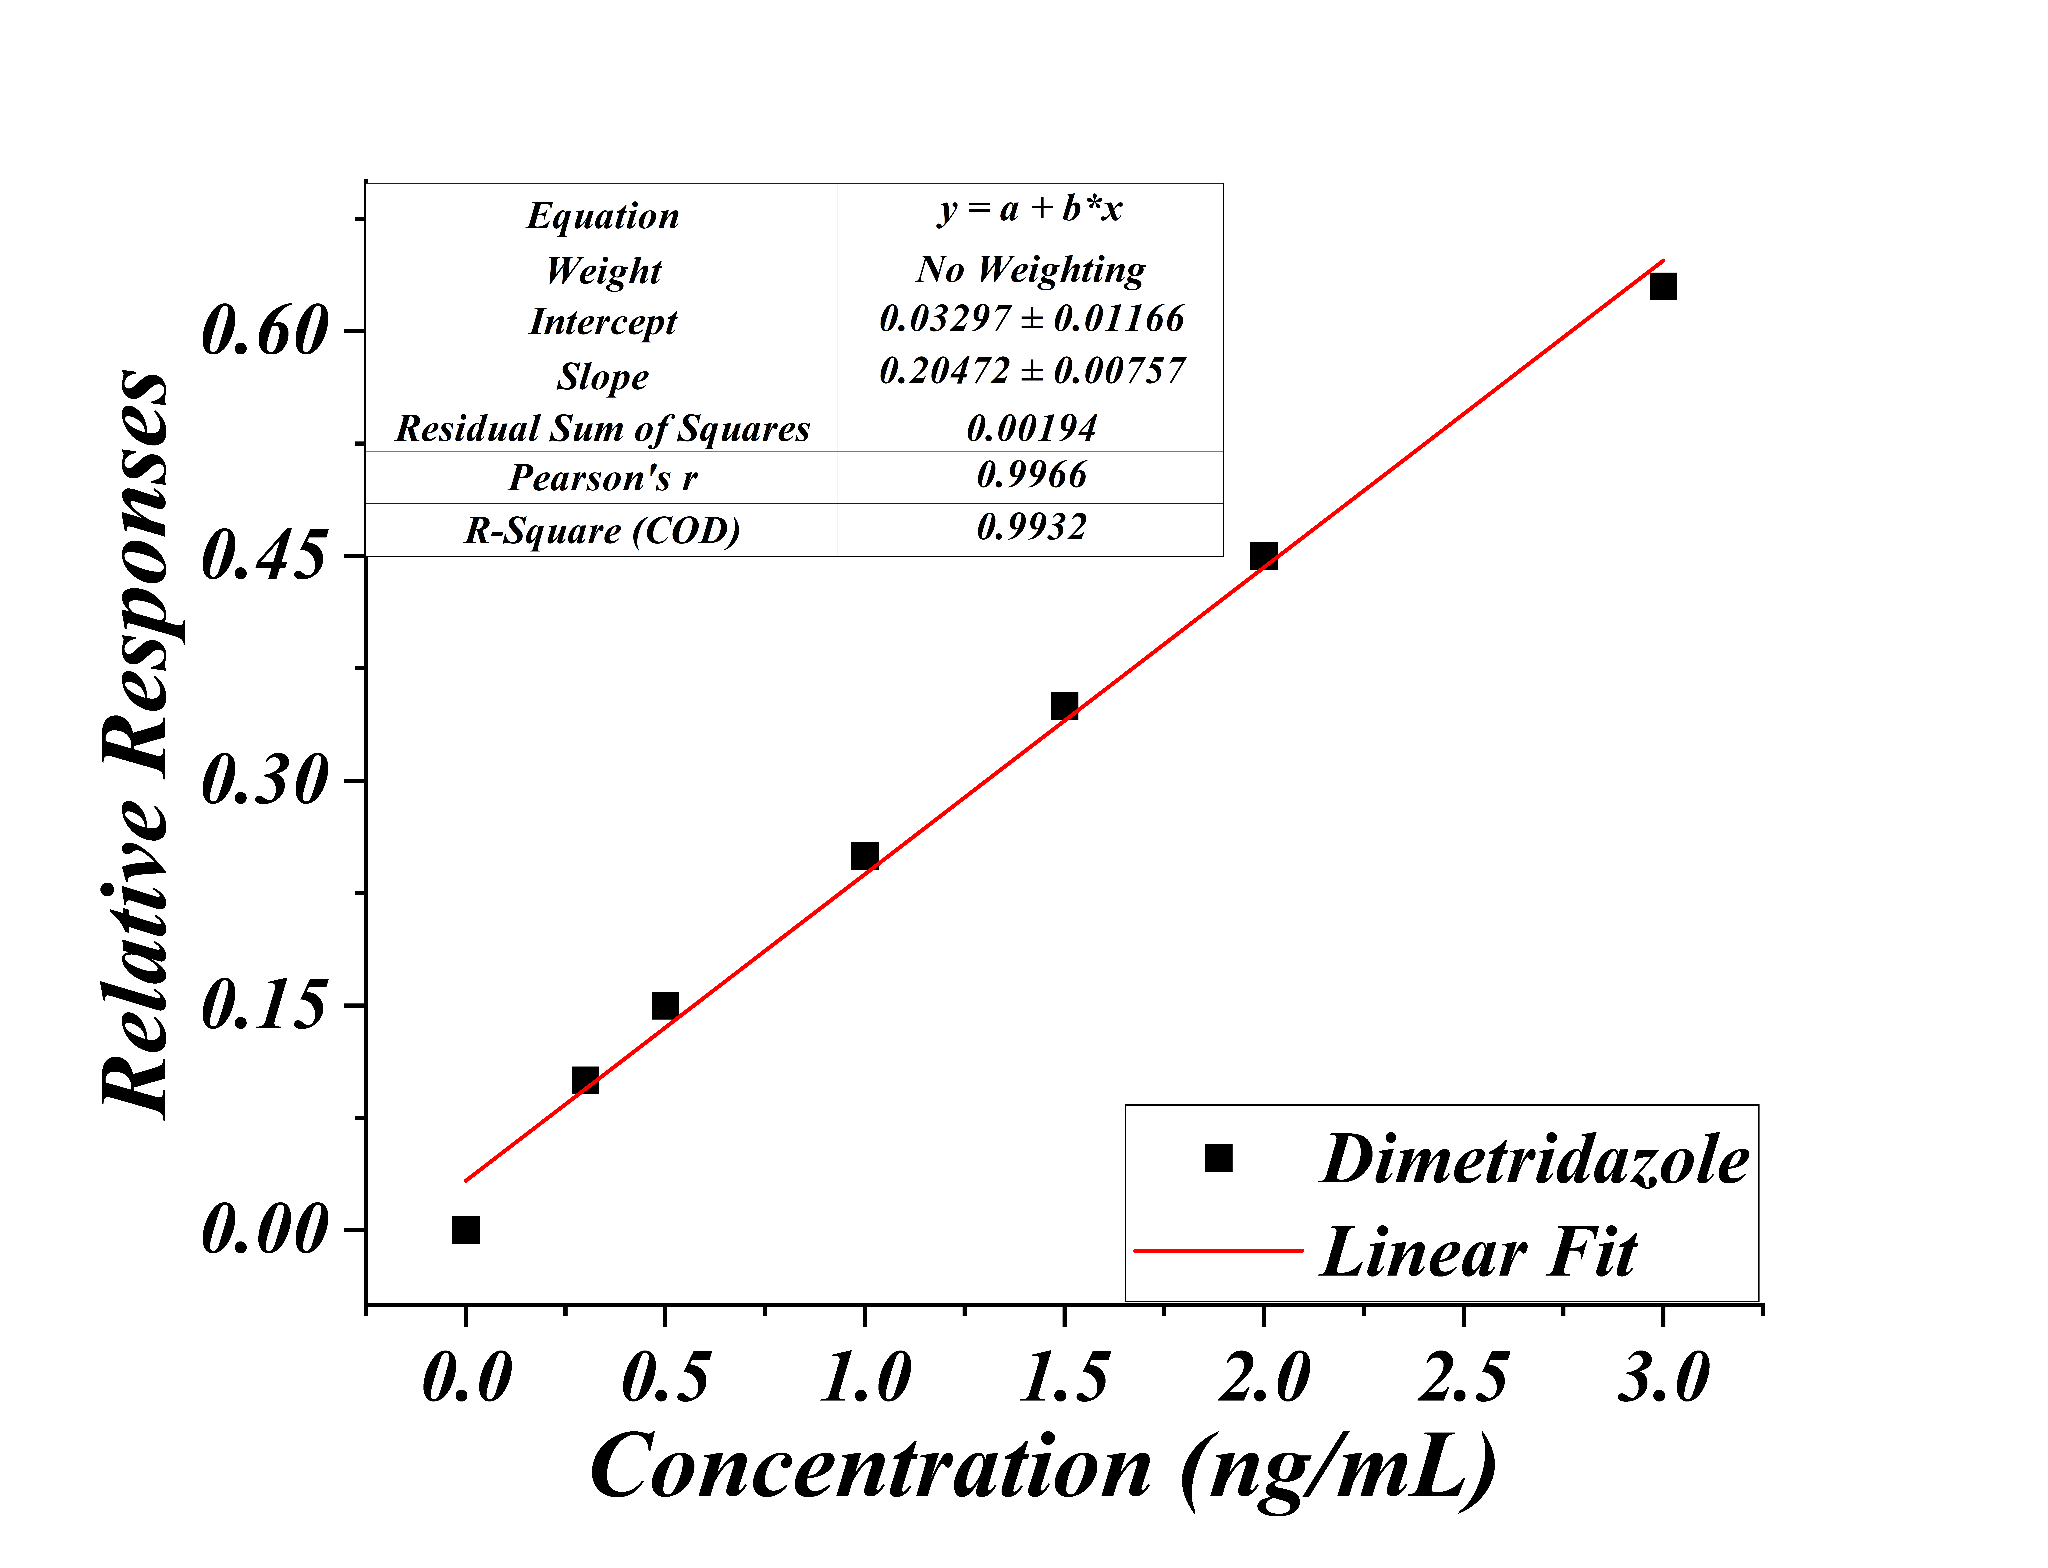
(d)
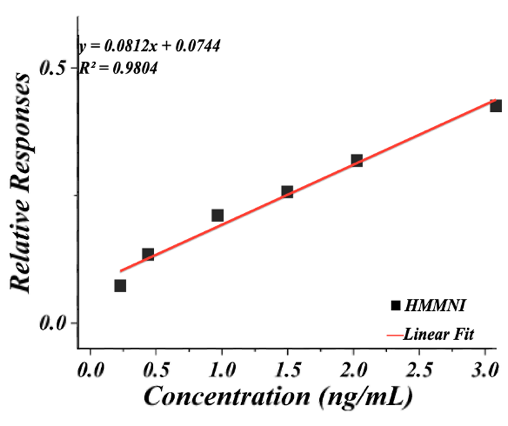


(e)
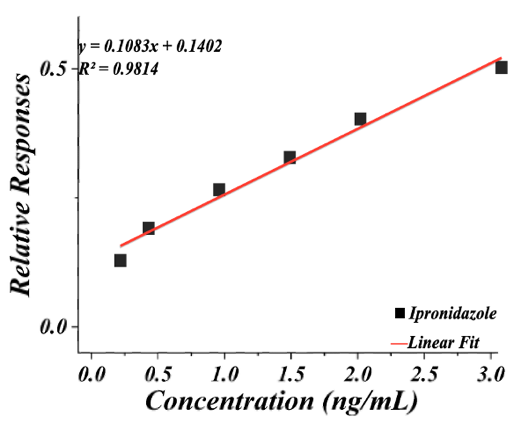
 (f)
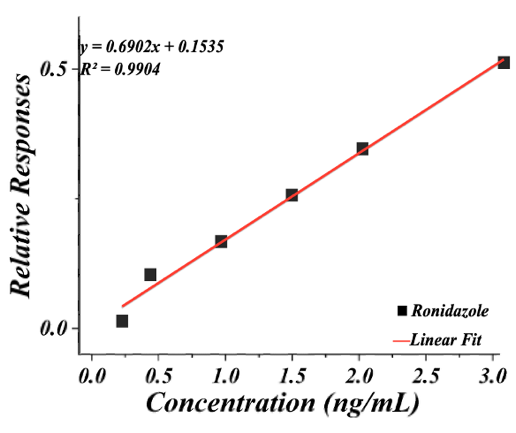


(g)
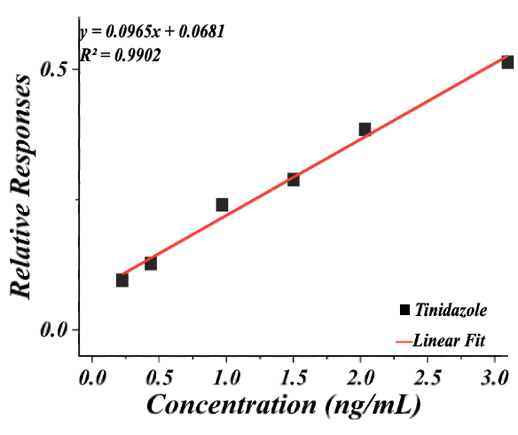


**Figure S3.** The calibration curves for analytes (5-nitroimidazole extraction via QuEChERS salts): (a) metronidazole (MNZ), (b) Metronidazole-OH (MNZ-OH), (c) Dimetridazole (DMZ), (d) Hydroxy dimetridazole (HMMNI), (e) Ipronidazole, (f) Ronidazole, and (g) Tinidazole.


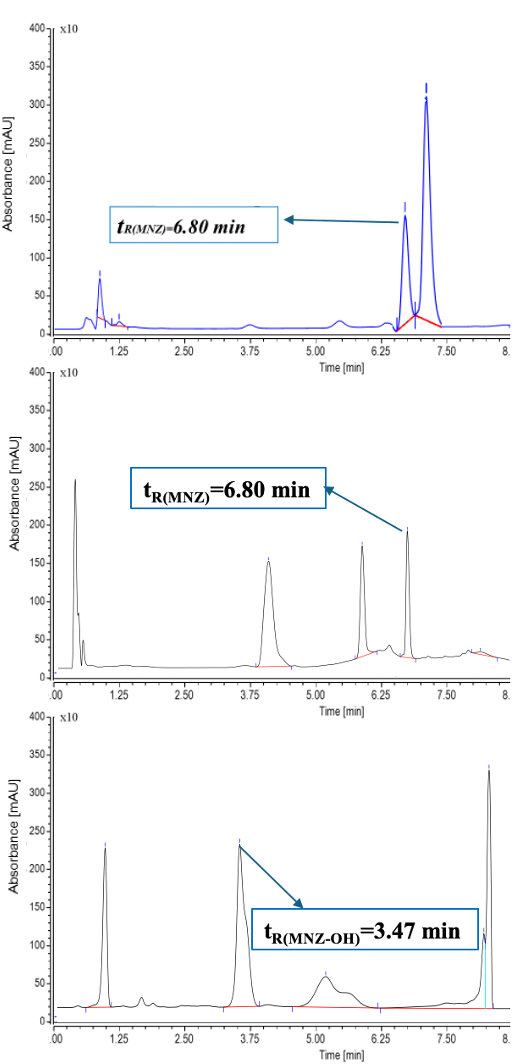


**Figure S4*.*** Total Ion Chromatography via LC-MS/MS after QuEChERS salt extraction process for the following samples out of the 24 testes samples: (a) MNZ peak for M11, (b) MNZ peak for M12 (tR(MNZ)= 6.80 min), and (c) MNZ-OH peak for M06(tR(MNZ-OH)= 3.47 min).


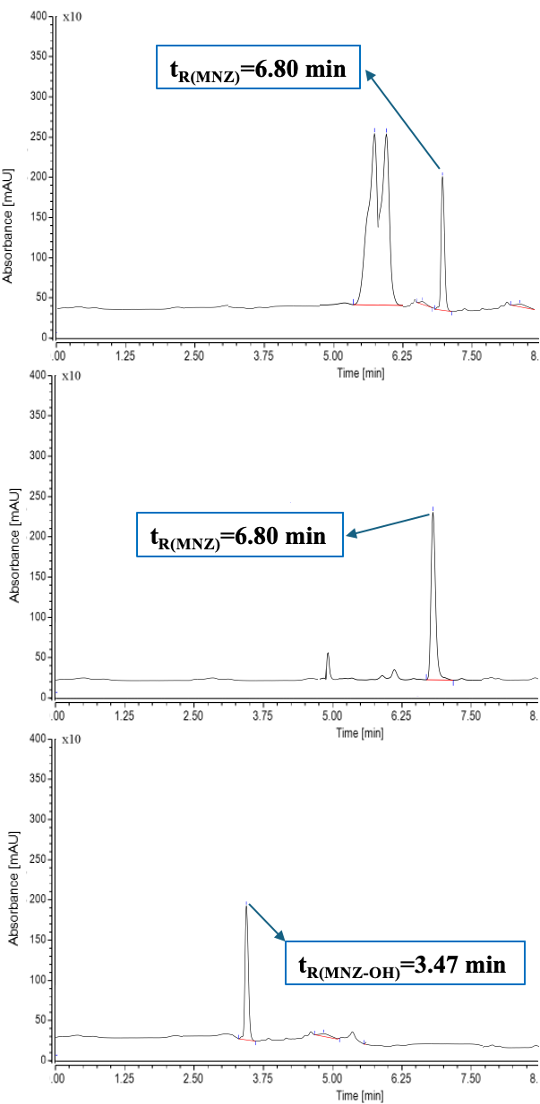


**Figure S5*.*** Total Ion Chromatography via LC-MS/MS after 52734-U-SupelMIP column extraction process for the following samples out of the 24 testes samples: (a) MNZ peak for M11, (b) MNZ peak for M12 (tR(MNZ)= 6.80 min), and (c) MNZ-OH peak for M06(tR(MNZ-OH)= 3.47 min).


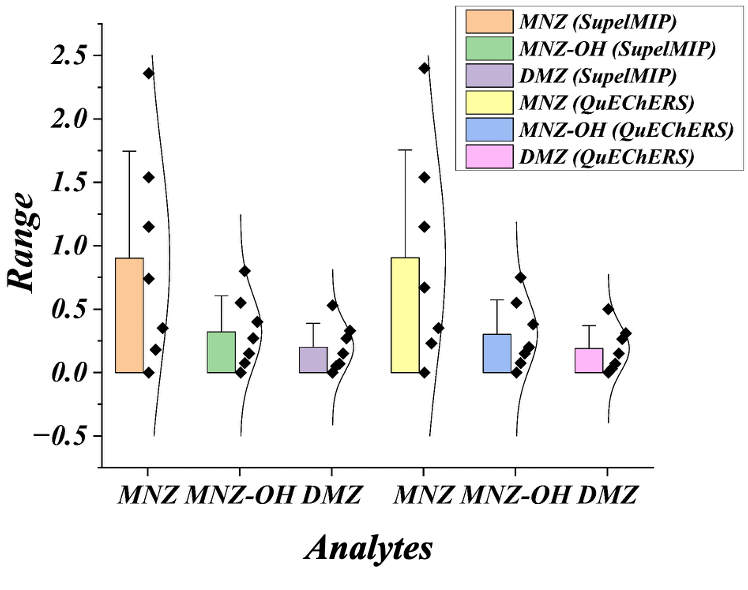


**Figure S6.** Bar Normal Distribution chart for MNZ, DMZ and MNZ-OH variables for two different extraction methods.


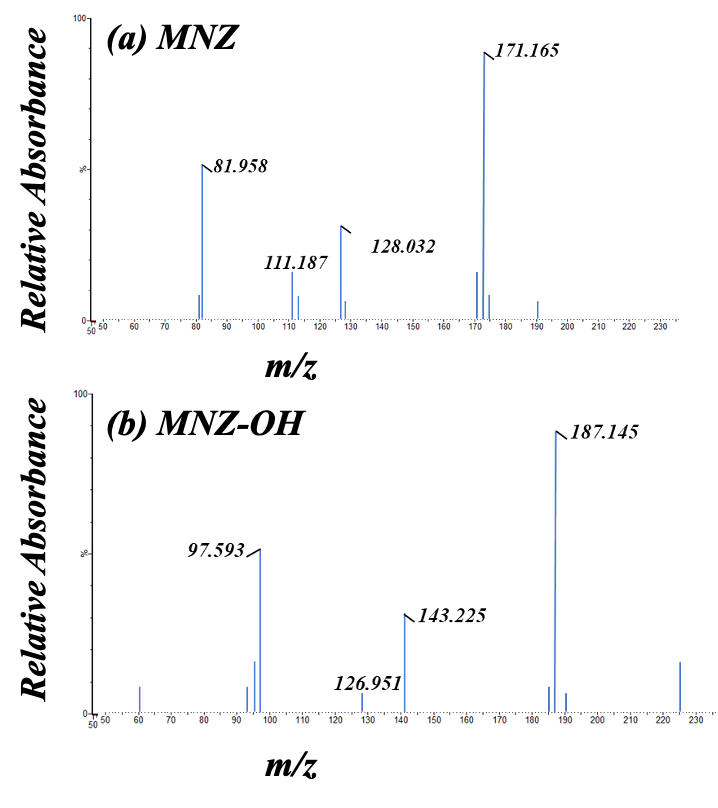


**Figure S7.** (a) MNZ m/z values and (b) MNZ-OH m/z values and their precursor/product ions (control experiment) for the positive samples via Orbitrap Exploris 480 Mass Spectrometer (HRMS).
